# Supplementary material
Source: PubMed Central journal article supplement (PMC3002868)
Supplement: supp_cvq265_cvq265supp.pdf [file supp_cvq265_cvq265supp.pdf]

Han et al.

## **Supplementary Methods**

### *Harvest and Culture of Neonatal Rat Cardiomyocytes*

All pups were used, as it is extremely difficult to differentiate between sexes anatomically at this neonatal stage. Spontaneously contracting cells were plated after 1 hour of differential plating to remove non-myocytes. Greater than 99% of the population was determined to be cardiomyocytes by immunostaining with cardiac myosin heavy chain antibody (#ab15, AbCam). The cells were grown in L-15 Leibovitz medium supplemented with 10% fetal bovine serum (FBS) in a standard tissue culture incubator.

### *Simulated Ischemia-Reperfusion*

Cells were treated with reagents of interest 30 minutes prior to start of hypoxia. These reagents include E2, ICI182780 ([ICI], Tocris), SB203580 ([SB], Sigma-Aldrich), rotenone (Sigma-Aldrich), Mito-Q<sup>®</sup> (a gift from Dr. Ellis Levin), pifithrin- $\alpha$  ([PFT], Sigma-Aldrich), propylpyrazole-triol and diarylpropionitrile ([PPT and DPN, respectively], Tocris). The cells were incubated in an anaerobic chamber (GasPack system, BD Biosciences) for 18 hours, which was purged with 95% N<sub>2</sub>, 5% CO<sub>2</sub> and sealed with an oxygen-consuming palladium catalyst. This created a hypoxic condition of 1.5 % O<sub>2</sub>. Following hypoxia, the chamber was opened to air, and cells placed in a standard incubator for reoxygenation for 1 hour.

### *Western Blotting*

After H/R, cardiomyocytes were washed and lysed as reported previously.<sup>1</sup> Protein concentration was determined by a bicinchoninic acid-based assay using a commercially available kit (Thermo Fisher Scientific), and 40  $\mu$ g of protein was loaded onto 10 or 12 % SDS-PAGE gel for electrophoresis. Proteins

were transferred to nitrocellulose membrane, which was blocked and probed with primary antibody against the protein of interest, then with anti-rabbit horseradish peroxidase conjugated secondary antibody (#7074, Cell Signaling Technology) in a standard manner. The membrane was then incubated with chemiluminescence reagents using a commercially available ECL Plus Western Blotting Detection System (Amersham Biosciences) and exposed to film. The band intensity on radiographs was determined by scanning with UN-SCAN-IT™ software (Silk Scientific). Primary antibodies used for western blotting include polyclonal antibody against actin (#4968), serine-15 phosphorylated p53 (#9284), Cyt *c* (#4272), caspase-9 (#9506), cleaved caspase-9 (#9507), Bcl-2 (#2876), Bax (#2772) and CoxIV (#4844) from Cell Signaling Technology, and p38β (#sc-6187-R) and p53 (#sc-6243) from Santa Cruz Biotechnology.

For the assessment of the intrinsic apoptotic pathway, the release of Cyt *c* from mitochondria was examined. Mitochondria were isolated by following the protocols of a commercially available Mitochondria Isolation Kit for Cultured Cells (Thermo Scientific). Western blotting was performed on mitochondrial and cytosolic fractions for Cyt *c*, using commercial antibody (#4272, Cell Signaling Technology). Antibody to cytochrome *c* oxidase IV ([CoxIV], #4844, Cell Signaling Technology) was used for a mitochondrial loading control.

### *Immunofluorescence*

Cardiomyocytes grown on glass bottom dishes (MatTek) were stained with MitoTracker® Red CMXR according to the manufacturer's instructions (Invitrogen) at a final concentration of 500 nM. Cells were fixed in 3.7% paraformaldehyde for 15 minutes at 37 °C, permeabilized in 0.2% Triton® X-100 for 10 minutes at room temperature, and incubated with p53 primary antibody (#sc-6243, Santa Cruz Biotechnology) overnight at 4 °C. Then, the cells were incubated with FITC-conjugated secondary antibody (Vector Lab) for 1 hour, mounted with Vectashield (Vector Lab) and examined under fluorescent microscope.

### Supplementary Tables

**Table 1.** Cell counts from apoptosis assay in Fig. 1A

| Condition    | Apoptotic Cell # | Total Cell # | Mean % Apoptosis | SE  |
|--------------|------------------|--------------|------------------|-----|
| N            | 7                | 362          | 2                | 1.3 |
| H/R          | 301              | 442          | 68               | 5.5 |
| H/R+PFT      | 151              | 502          | 30               | 2.0 |
| H/R+siRNAp53 | 104              | 400          | 26               | 1.3 |
| N+PFT        | 40               | 441          | 9                | 5.7 |
| N+siRNAp53   | 26               | 521          | 5                | 0.3 |

Apoptotic cells were determined by counting the number of green fluorescent, annexin V-positive cells.

Total cell # was determined by counting all Hoechst 33342-stained nuclei in the visual field. Cell # represents the numbers averaged from experiments replicated three times. Mean % apoptosis represents the mean percentage of apoptotic cells derived from experiments replicated three times. SE, standard error.

**Table 2.** Cell counts from apoptosis assay in Fig. 5E

| Condition | Apoptotic Cell # | Total Cell # | Mean % Apoptosis | SE |
|-----------|------------------|--------------|------------------|----|
| N         | 19               | 269          | 7                | 4  |
| H/R       | 169              | 447          | 37               | 5  |
| H/R+E2    | 78               | 526          | 14               | 3  |
| H/R+PPT   | 68               | 257          | 26               | 6  |
| H/R+DPN   | 101              | 597          | 17               | 8  |

Apoptotic cell # was determined by counting the number of green fluorescent, annexin V-positive cells.

Total cell # was determined by counting all nuclei in the visual field. Cell # represents the numbers averaged from experiments replicated three times. Mean % apoptosis represents the mean percentage of apoptotic cells derived from experiments replicated three times. SE, standard error.

#### Supplementary Figure

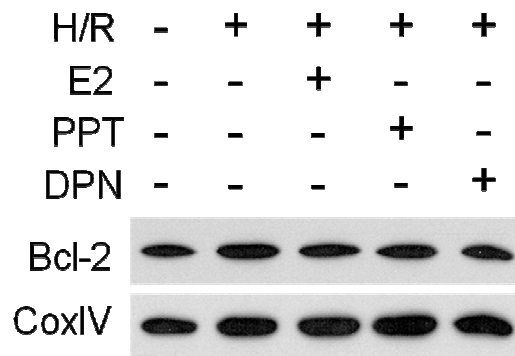

**Supp. Fig.** Bcl-2 expression does not change with E2, PPT, or DPN treatment. Following H/R in the presence or absence of E2, PPT, and DPN (each in 10 nM), cells were lysed and mitochondrial fractions separated for immunoblotting of Bcl-2, a protein that mainly resides in mitochondria, per protocol described in the Methods. Loading control was done by immunoblotting for a mitochondrial marker

protein, CoxIV. Representative immunoblots from triplicate experiments are shown. There was no statistically significant difference among the conditions in band intensity of Bcl-2 or CoxIV (data not shown).

### **Supplementary Reference**

1. Kim JK, Pedram A, Razandi M, Levin ER. Estrogen prevents cardiomyocyte apoptosis through inhibition of reactive oxygen species and differential regulation of p38 kinase isoforms. *J Biol Chem* 2006;**281**:6760-6767.
